# Supplementary material for: Genetic Polymorphisms, Gene–Gene Interactions and Neurologic Sequelae at Two Years Follow-Up in Newborns with Hypoxic-Ischemic Encephalopathy Treated with Hypothermia
Source: MDPI journal article supplement (doi:10.3390/antiox10091495), 2021-09-20
Supplement: s1 [file s1]

## Supplementary Materials:

Table S1: The association of *IL1B* haplotypes with epilepsy and cerebral palsy (CP)

| Haplotype | Estimated frequency |               | OR (95% CI)          | P     | Estimated frequency |       | OR (95% CI)           | P     |
|-----------|---------------------|---------------|----------------------|-------|---------------------|-------|-----------------------|-------|
|           | Without epilepsy    | With epilepsy |                      |       | Without CP          | CP    |                       |       |
| GCC       | 0.38                | 0.33          | Ref.                 |       | 0.402               | 0.276 | Ref.                  |       |
| GCG       | 0.31                | 0.27          | 1.17 (0.38-3.57)     | 0.788 | 0.298               | 0.290 | 1.61 (0.48-5.38)      | 0.438 |
| CTC       | 0.17                | 0.33          | 2.51 (0.70-8.96)     | 0.156 | 0.164               | 0.357 | 3.53 (0.89-13.99)     | 0.072 |
| CTG       | 0.09                | 0.01          | 0.85 (0.00-19583.92) | 0.975 | 0.086               | 0.010 | 0.94 (0.00-575325.17) | 0.993 |

The SNPs are ordered from the 5' - to 3'-end as follows: rs1143623, rs16944, and rs1071676

Table S2: Genotype frequencies

| Gene         | SNP        | Role        | Genotype | N (%)     | MAF                | pHWE  |
|--------------|------------|-------------|----------|-----------|--------------------|-------|
| <i>SOD2</i>  | rs4880     | p.Ala16Val  | CC       | 17 (30.9) | 0.400              | 0.116 |
|              |            |             | CT       | 32 (58.2) |                    |       |
|              |            |             | TT       | 6 (10.9)  |                    |       |
| <i>CAT</i>   | rs1001179  | c.-262C>T   | CC       | 37 (67.3) | 0.173              | 0.545 |
|              |            |             | CT       | 17 (30.9) |                    |       |
|              |            |             | TT       | 1 (1.8)   |                    |       |
| <i>GPX1</i>  | rs1050450  | p.Pro198Leu | CC       | 25 (45.5) | 0.336              | 0.639 |
|              |            |             | CT       | 23 (41.8) |                    |       |
|              |            |             | TT       | 7 (12.7)  |                    |       |
| <i>NLRP3</i> | rs35829419 | p.Gln705Lys | CC       | 47 (85.5) | 0.073              | 0.561 |
|              |            |             | CA       | 8 (14.5)  |                    |       |
| <i>CARD8</i> | rs2043211  | p.Cys10Ter  | AA       | 27 (49.1) | 0.309              | 0.639 |
|              |            |             | AT       | 22 (40.0) |                    |       |
|              |            |             | TT       | 6 (10.9)  |                    |       |
| <i>IL1B</i>  | rs1143623  | c.-1560G>C  | GG       | 28 (50.9) | 0.291              | 0.821 |
|              |            |             | GC       | 22 (40.0) |                    |       |
|              |            |             | CC       | 5 (9.1)   |                    |       |
|              | rs16944    | c.-598T>C   | TT       | 8 (14.5)  | 0.673 <sup>a</sup> | 0.196 |
|              |            |             | TC       | 20 (36.4) |                    |       |
|              |            |             | CC       | 27 (49.1) |                    |       |
|              | rs1071676  | c.*505G>C   | GG       | 22 (40.0) | 0.373              | 0.836 |
|              |            |             | GC       | 25 (45.5) |                    |       |
|              |            |             | CC       | 8 (14.5)  |                    |       |
| <i>TNF</i>   | rs1800629  | c.-308G>A   | GG       | 37 (67.3) | 0.191              | 0.385 |
|              |            |             | GA       | 15 (27.3) |                    |       |
|              |            |             | AA       | 3 (5.5)   |                    |       |

<sup>a</sup>variant allele frequency
